# Supplementary material for: Construction of a bioreporter by heterogeneously expressing a Vibrio natriegens recA::luxCDABE fusion in Escherichia coli, and genotoxicity assessments of petrochemical-contaminated groundwater in northern China
Source: Royal Society of Chemistry journal article supplement (doi:10.1039/c6em00120c), 2016-01-01
Supplement: c6em00120c1.xlsx [file c6em00120c1.xlsx]

## Sheet: sheet1
Items	Sample No.		1	2	4	5	6	7	8	9	10	11	12
	unit	Detection Limit
TPH	μg/L				140		94.9
napthelene	ng/L	10.0				29.5	137	40.2	38.9	11.8	80.1	147	153750
acenaphthylene	ng/L	2.00											404
acenaphthene	ng/L	2.00					15				34	49.6	1134
fluorene	ng/L	4.50		12.9	5.73		13.6				40.4	16.5	1819
phenanthrene	ng/L	8.00					15			12.2	81.4	11	865
anthracene	ng/L	1.50			3.59						6.95		75.4
fluoranthene	ng/L	5.00					8.77		8.77	10.2	29.1		60
pyrene	ng/L	5.00			8.55	6.31	12.2		5.84	6.91	16.1	5.39	79.2
benzo[a]anthracene	ng/L	1.50											8.65
Chrysene	ng/L	2.00									2.06	2.39	6.04
Total PAHs	ng/L			12.9	17.9	35.8	202	40.2	53.5	41.1	290	232	158201
chloroethylene	μg/L	0.50
vinylidene chloride	μg/L	0.20			2.73	3.93	2.96		0.95		40.7	2.97
dichloromethane	μg/L	0.50									6.97	1.15
Methyl Tertiary Butyl Ether	μg/L	0.10									81.6	4.88	664
1,2-dichloroethylene	μg/L	0.20										2.71
chloroform	μg/L	0.20	0.82		0.44	0.72	1.40	3.99	2.33	5.70	491	79.4	2.40
tetrachloromethane	μg/L	0.20								0.46	29.1	5.36
1,2-dichloroethane	μg/L	0.30									10.6		646
benzene	μg/L	0.30									57.1		23132
Trichloroethylene	μg/L	0.20							1.64	3.12	97.8	31.9
1,2-dichloropropane	μg/L	0.20							2.26	1.92	29.3	4.58
toluene	μg/L	0.30											387
1,1,2-Trichloroethane	μg/L	0.30								1.49	366	24.9
tetrachloroethylene	μg/L	0.20					1.08		2.43	2.06	26.4	4.31
chlorpropham	μg/L	0.10									9.40
ethylbenzene	μg/L	0.30											5292
p-xylene/m-xylene	μg/L	0.30											839
o-xylene	μg/L	0.30									1.11		2381
styrene	μg/L	0.30											94.4
1,4-dichlorobenzene	μg/L	0.10									0.93
Total VOCs	μg/L		0.82		3.17	4.65	5.44	3.99	9.61	17.87	1248.01	162.16	33437.8
TPHs	total petroleum hydrocarbons
PAHs	polycyclic aromatic hydrocarbons
VOCs	volatile organic compounds
