# Supplementary material for: Construction of a bioreporter by heterogeneously expressing a Vibrio natriegens recA::luxCDABE fusion in Escherichia coli, and genotoxicity assessments of petrochemical-contaminated groundwater in northern China
Source: Royal Society of Chemistry journal article supplement (doi:10.1039/c6em00120c), 2016-01-01
Supplement: c6em00120c2.pdf [file c6em00120c2.pdf]

**Table S2** Primers used in this study.

| Primers   | Sequences                                |
|-----------|------------------------------------------|
| V_recA_f  | 5'-CGTGATAAGCTCTGCGGCAA-3'               |
| V_recA_r  | 5'-TTAAAACTCTTCTTCTTTCTTCTC-3' 5'-       |
| V_recA_if | GAATTCGCGGGATCCGGTGCTATCGACGTAATGG-3'    |
| V_recA_ir | 5'-CCATTACGTCGATAGCACCGGATCCCGCGAATTC-3' |

EcoRI sites are bolded.
